# Supplementary material for: Selective Generation of Aldimine and Ketimine Tautomers of the Schiff Base Condensates of Amino Acids with Imidazole Aldehydes or of Imidazole Methanamines with Pyruvates—Isomeric Control with 2- vs. 4-Substituted Imidazoles
Source: MDPI journal article supplement (doi:10.3390/molecules29061324), 2024-03-16
Supplement: s1 [file s1]

# SUPPLEMENTAL INFORMATION

## Selective Generation of Aldimine and Ketimine Tautomers of the Schiff Base Condensates of Amino Acids with Imidazole Aldehydes or of Imidazole Methanamines with Pyruvates—Isomeric Control with 2- vs 4- substituted Imidazoles

Greg Brewer<sup>a</sup>, Cynthia Brewer<sup>a</sup>, Raymond J. Butcher<sup>b</sup>, Peter Zavalij<sup>c</sup>

<sup>a</sup> Department of Chemistry, The Catholic University of America, Washington, DC 20064, USA

<sup>b</sup> Department of Chemistry, Howard University, Washington, DC 20059, USA

<sup>c</sup> Department of Chemistry, University of Maryland, College Park, Md 20742, USA

**Table S1** Crystallographic Data for new Nickel Ketimine and Aldimine complexes

**Table S2.** Selected structural parameters, distances in Å and trans angles in °, involving the nickel(II) for the aldimine and ketimine forms of a) R=Me Ni(A<sub>Ald</sub>-5Me4Im)<sub>2</sub> and Ni(A<sub>Ket</sub>-5Me4Im)<sub>2</sub> b) R=iPr Ni(V<sub>Ald</sub>-5Me4Im)<sub>2</sub> and c) R=iBu Ni(L<sub>Ald</sub>-5Me4Im)<sub>2</sub> and Ni(L<sub>Ket</sub>-5Me4Im)<sub>2</sub>.

**Table S3** Selected structural parameters, distances in Å and angles in °, for the aldimine and ketimine forms of a) R=Me Ni(A<sub>Ald</sub>-5Me4Im)<sub>2</sub> and Ni(A<sub>Ket</sub>-5Me4Im)<sub>2</sub> (in text) b) R=iPr Ni(V<sub>Ald</sub>-5Me4Im)<sub>2</sub> and Ni(V<sub>Ket</sub>-5Me4Im)<sub>2</sub> and c) R=iBu Ni(L<sub>Ald</sub>-5Me4Im)<sub>2</sub> and Ni(L<sub>Ket</sub>-5Me4Im)<sub>2</sub> (b) and c) in Supplemental.

ORTEP drawing of each complex

IR spectra for each complex

ESI MS for each complex

**Table S1** Crystallographic Data for new Nickel Ketimine and Aldimine complexes

| Compound                      | Ni(A <sub>Ket</sub> -2Im) <sub>2</sub><br>·3H <sub>2</sub> O                                                       | Ni(A <sub>Ket</sub> -NMe2Im) <sub>2</sub><br>·2H <sub>2</sub> O                                                  | [Ni(L <sub>Ket</sub> -NMe2Im) <sub>2</sub> ]<br>·1.5 H <sub>2</sub> O                                                          | Ni(A <sub>Ald</sub> -5Me4Im) <sub>2</sub><br>·H <sub>2</sub> O                                                    | Ni(A <sub>Ket</sub> -5Me4Im) <sub>2</sub><br>·2H <sub>2</sub> O                                          |
|-------------------------------|--------------------------------------------------------------------------------------------------------------------|------------------------------------------------------------------------------------------------------------------|--------------------------------------------------------------------------------------------------------------------------------|-------------------------------------------------------------------------------------------------------------------|----------------------------------------------------------------------------------------------------------|
| CSD number                    | 2015580                                                                                                            | 2285095                                                                                                          | 2323328                                                                                                                        | 2285097                                                                                                           | 2285098                                                                                                  |
| Empirical formula             | C <sub>14</sub> H <sub>16</sub> N <sub>6</sub> NiO <sub>4</sub><br>·3H <sub>2</sub> O                              | C <sub>16</sub> H <sub>20</sub> N <sub>6</sub> NiO <sub>4</sub><br>·2 H <sub>2</sub> O                           | C <sub>44</sub> H <sub>64</sub> N <sub>12</sub> Ni <sub>2</sub> O <sub>8</sub><br>·3H <sub>2</sub> O                           | C <sub>16</sub> H <sub>20</sub> N <sub>6</sub> NiO <sub>4</sub><br>·H <sub>2</sub> O                              | C <sub>16</sub> H <sub>20</sub> N <sub>6</sub> NiO <sub>4</sub><br>·2H <sub>2</sub> O                    |
| M/ g mol <sup>-1</sup>        | 443.07                                                                                                             | 455.12                                                                                                           | 1060.54                                                                                                                        | 437.10                                                                                                            | 455.12                                                                                                   |
| Temperature /K                | 150(2)                                                                                                             | 293(2)                                                                                                           | 100(2)                                                                                                                         | 293(2)                                                                                                            | 297(2)                                                                                                   |
| $\lambda$ / Å                 | 0.71073                                                                                                            | 1.54184                                                                                                          | 1.54184                                                                                                                        | 1.54178                                                                                                           | 1.54178                                                                                                  |
| Crystal System                | Monoclinic                                                                                                         | Monoclinic                                                                                                       | Triclinic                                                                                                                      | Monoclinic                                                                                                        | Orthorhombic                                                                                             |
| Space group                   | P21/n                                                                                                              | P21/n                                                                                                            | P-1                                                                                                                            | P21/n                                                                                                             | Pbca                                                                                                     |
| Unit cell dimensions          | a=11.2052(5) Å,<br>b=15.4495(7) Å,<br>c=11.4742(5) Å,<br>$\alpha$ = 90°<br>$\beta$ =106.8057(7)°<br>$\gamma$ = 90° | a=9.3926(2) Å,<br>b=18.7718(3) Å,<br>c=11.6171(2) Å,<br>$\alpha$ = 90°<br>$\beta$ =105.188(2)°<br>$\gamma$ = 90° | a=10.6058(6) Å,<br>b=12.2664(7) Å,<br>c=12.4833(7) Å,<br>$\alpha$ = 61.850(6)°<br>$\beta$ =83.338(5)°<br>$\gamma$ = 66.723(6)° | a=14.2064(8) Å,<br>b=9.0827(4) Å,<br>c=16.1368(10) Å,<br>$\alpha$ = 90°<br>$\beta$ =112.662(7)°<br>$\gamma$ = 90° | a=9.5290(9) Å,<br>b=16.1523(4) Å,<br>c=27.4249(6) Å,<br>$\alpha$ = 90°<br>$\beta$ =90°<br>$\gamma$ = 90° |
| Volume/ Å <sup>3</sup>        | 1901.52(15)                                                                                                        | 1976.74(7)                                                                                                       | 1310.39(15)                                                                                                                    | 1921.4(2)                                                                                                         | 4221.11(17)                                                                                              |
| Z                             | 4                                                                                                                  | 4                                                                                                                | 1                                                                                                                              | 4                                                                                                                 | 8                                                                                                        |
| Abs. Coeff./mm <sup>-1</sup>  | 1.070                                                                                                              | 1.837                                                                                                            | 1.445                                                                                                                          | 1.826                                                                                                             | 1.720                                                                                                    |
| F(000)                        | 920.0                                                                                                              | 952                                                                                                              | 562                                                                                                                            | 912                                                                                                               | 1904                                                                                                     |
| Crystal size/ mm <sup>3</sup> | 0.41x0.37x0.35                                                                                                     |                                                                                                                  | 0.415x0.084x0.066                                                                                                              |                                                                                                                   | 0.240x0.186x0.170                                                                                        |
| Theta range/°                 | 4.476 to 62.498                                                                                                    | 4.594 to 78.875                                                                                                  | 4.032 to 76.487                                                                                                                | 3.531 to 75.066                                                                                                   | 3.223 to 76.260                                                                                          |
| Index ranges                  | -16≤h≤16<br>-22≤k≤22<br>-16≤l≤16                                                                                   | -11≤h≤11<br>-22≤k≤23<br>-13≤l≤14                                                                                 | -13≤h≤13<br>-7≤k≤15<br>-15≤l≤15                                                                                                | -16≤h≤17<br>-10≤k≤11<br>-20≤l≤18                                                                                  | -12≤h≤10<br>-20≤k≤20<br>-33≤l≤34                                                                         |
| Reflections Collected         | 33439                                                                                                              | 35489                                                                                                            | 14315                                                                                                                          | 30655                                                                                                             | 52407                                                                                                    |
| Independent Reflections       | 6168                                                                                                               | 4064                                                                                                             | 5163                                                                                                                           | 3859                                                                                                              | 4383                                                                                                     |
| R1                            | 0.0365                                                                                                             | 0.0715                                                                                                           | 0.0762                                                                                                                         | 0.0726                                                                                                            | 0.0410                                                                                                   |
| wR2                           | 0.0757                                                                                                             | 0.2016                                                                                                           | 0.1930                                                                                                                         | 0.1906                                                                                                            | 0.1105                                                                                                   |
| GOF on F <sup>2</sup>         | 1.000                                                                                                              | 1.065                                                                                                            | 1.069                                                                                                                          | 1.067                                                                                                             | 1.053                                                                                                    |

Table S1 cont.

| Compound                      | Ni(V <sub>Ald</sub> -5Me4Im) <sub>2</sub>                                                                                  | Ni(V <sub>Ket</sub> -5Me4Im) <sub>2</sub>                                                                                 | Ni(L <sub>Ald</sub> -5Me4Im) <sub>2</sub>                                                                                   | Ni(L <sub>Ket</sub> -5Me4Im) <sub>2</sub>                                                                                   |
|-------------------------------|----------------------------------------------------------------------------------------------------------------------------|---------------------------------------------------------------------------------------------------------------------------|-----------------------------------------------------------------------------------------------------------------------------|-----------------------------------------------------------------------------------------------------------------------------|
| CSD number                    | 2206541                                                                                                                    | 2285096                                                                                                                   | 2323329                                                                                                                     | 2323331                                                                                                                     |
| Empirical formula             | C <sub>20</sub> H <sub>28</sub> N <sub>6</sub> NiO <sub>4</sub>                                                            | C <sub>20</sub> H <sub>28</sub> N <sub>6</sub> NiO <sub>4</sub>                                                           | C <sub>22</sub> H <sub>32</sub> N <sub>6</sub> NiO <sub>4</sub>                                                             | C <sub>22</sub> H <sub>32</sub> N <sub>6</sub> NiO <sub>4</sub>                                                             |
| M/ g mol <sup>-1</sup>        | 475.19                                                                                                                     | 475.19                                                                                                                    | 503.24                                                                                                                      | 503.24                                                                                                                      |
| Temperature/ K                | 102(2)                                                                                                                     | 263(2)                                                                                                                    | 100(2)                                                                                                                      | 170(2)                                                                                                                      |
| $\lambda$ / Å                 | 0.71073                                                                                                                    | 1.54178                                                                                                                   | 1.54184                                                                                                                     | 0.71073                                                                                                                     |
| Crystal System                | Monoclinic                                                                                                                 | Orthorhombic                                                                                                              | Monoclinic                                                                                                                  | Monoclinic                                                                                                                  |
| Space group                   | C2/c                                                                                                                       | Pbcn                                                                                                                      | C2/c                                                                                                                        | C2/c                                                                                                                        |
| Unit cell dimensions          | a=25.658(4) Å,<br>b=29.909(4) Å,<br>c=12.8720(19) Å,<br>$\alpha=90^\circ$<br>$\beta=110.693(7)^\circ$<br>$\gamma=90^\circ$ | a=11.59070(10) Å,<br>b=13.91300(10) Å,<br>c=13.92430(10) Å,<br>$\alpha=90^\circ$<br>$\beta=90^\circ$<br>$\gamma=90^\circ$ | a=14.7896(4) Å,<br>b=14.4214(4) Å,<br>c=12.5723(3) Å,<br>$\alpha=90^\circ$<br>$\beta=110.891(2)^\circ$<br>$\gamma=90^\circ$ | a=15.7370(7) Å,<br>b=13.8295(6) Å,<br>c=12.6156(5) Å,<br>$\alpha=90^\circ$<br>$\beta=115.467(2)^\circ$<br>$\gamma=90^\circ$ |
| Volume/ Å <sup>3</sup>        | 9241(2)                                                                                                                    | 2245.45(3)                                                                                                                | 2506.75(12)                                                                                                                 | 2478.81(19)                                                                                                                 |
| Z                             | 16                                                                                                                         | 4                                                                                                                         | 4                                                                                                                           | 4                                                                                                                           |
| Abs. Coeff./mm <sup>-1</sup>  | 0.877                                                                                                                      | 1.573                                                                                                                     | 1.438                                                                                                                       | 0.821                                                                                                                       |
| F(000)                        | 4000                                                                                                                       | 1000                                                                                                                      | 1064                                                                                                                        | 1064.0                                                                                                                      |
| Crystal size/ mm <sup>3</sup> |                                                                                                                            | 0.287x0.226x0.105                                                                                                         | 0.245x0.139x0.127                                                                                                           | 0.19x0.03x0.025                                                                                                             |
| Theta range/ $^\circ$         | 2.171 to 25.259                                                                                                            | 4.966 to 76.310                                                                                                           | 4.430 to 76.217                                                                                                             | 4.568to 60.204                                                                                                              |
| Index ranges                  | -30 $\leq$ h $\leq$ 30<br>-35 $\leq$ k $\leq$ 35<br>-15 $\leq$ l $\leq$ 15                                                 | -12 $\leq$ h $\leq$ 14<br>-17 $\leq$ k $\leq$ 17<br>-17 $\leq$ l $\leq$ 17                                                | -18 $\leq$ h $\leq$ 18<br>-15 $\leq$ k $\leq$ 18<br>-15 $\leq$ l $\leq$ 15                                                  | -22 $\leq$ h $\leq$ 22<br>-19 $\leq$ k $\leq$ 19<br>-17 $\leq$ l $\leq$ 17                                                  |
| Reflections Collected         | 87793                                                                                                                      | 117086                                                                                                                    | 22899                                                                                                                       | 47084                                                                                                                       |
| Independent Reflections       | 8372                                                                                                                       | 2344                                                                                                                      | 2581                                                                                                                        | 3639                                                                                                                        |
| R1                            | 0.0871                                                                                                                     | 0.0325                                                                                                                    | 0.0788                                                                                                                      | 0.0321                                                                                                                      |
| wR2                           | 0.1901                                                                                                                     | 0.0900                                                                                                                    | 0.2091                                                                                                                      | 0.0730                                                                                                                      |
| GOF on F <sup>2</sup>         | 1.065                                                                                                                      | 1.051                                                                                                                     | 1.127                                                                                                                       | 1.052                                                                                                                       |

Table S2. Selected structural parameters, distances in Å and trans angles in °, involving the nickel(II) for the aldimine and ketimine forms of a) R=Me Ni(A<sub>Ald</sub>-5Me4Im)<sub>2</sub> and Ni(A<sub>Ket</sub>-5Me4Im)<sub>2</sub> b) R=iPr Ni(V<sub>Ald</sub>-5Me4Im)<sub>2</sub> and and c) R=iBu Ni(L<sub>Ald</sub>-5Me4Im)<sub>2</sub> and Ni(L<sub>Ket</sub>-5Me4Im)<sub>2</sub>.

| Parameter\cpd.                      | Ni(A <sub>Ald</sub> -5Me4Im) <sub>2</sub> | Ni(A <sub>Ket</sub> -5Me4Im) <sub>2</sub> | Ni(V <sub>Ald</sub> -5Me4Im) <sub>2</sub> | Ni(V <sub>Ket</sub> -5Me4Im) <sub>2</sub> | Ni(L <sub>Ald</sub> -5Me4Im) <sub>2</sub> | Ni(L <sub>Ket</sub> -5Me4Im) <sub>2</sub> |
|-------------------------------------|-------------------------------------------|-------------------------------------------|-------------------------------------------|-------------------------------------------|-------------------------------------------|-------------------------------------------|
| Ni-N <sub>Im</sub>                  | 2.089(4)<br>2.087(4)                      | 2.0550(19)<br>2.0563(18)                  | 2.106(6)<br>2.117(6)                      | 2.0628(14)<br>2.0628(13)                  | 2.095(2)                                  | 2.0663(11)                                |
| Ni-N <sub>AA</sub>                  | 2.010(4)<br>2.012(4)                      | 2.0259(17)<br>2.0212(17)                  | 2.028(5)<br>2.012(5)                      | 2.0288(12)<br>2.0288(12)                  | 2.024(3)                                  | 2.0221(10)                                |
| Ni-O                                | 2.074(13)<br>2.088(4)                     | 2.1105(18)<br>2.1109(16)                  | 2.080(5)<br>2.069(5)                      | 2.0848(11)<br>2.0848(11)                  | 2.077(2)                                  | 2.0974(10)                                |
| N <sub>AA</sub> -Ni-N <sub>AA</sub> | 174.38(17)                                | 178.60(7)                                 | 170.1(3)                                  | 177.58(7)                                 | 177.83(14)                                | 178.57(7)                                 |
| N <sub>Im</sub> -Ni-O               | 159.60(13)<br>159.8(3)                    | 157.34(7)<br>157.14(7)                    | 158.9(2)<br>158.8(2)                      | 158.86(5)<br>158.87(5)                    | 158.31(9)<br>158.31(9)                    | 157.97(4)<br>157.97(4)                    |

Table S3 Selected structural parameters, distances in Å and angles in °, for the aldimine and ketimine forms of a) R=Me Ni(Ald-5Me4Im)<sub>2</sub> and Ni(Ket-5Me4Im)<sub>2</sub> (in text) b) R=iPr Ni(VAld-5Me4Im)<sub>2</sub> and Ni(VKet-5Me4Im)<sub>2</sub> and c) R=iBu Ni(LAld-5Me4Im)<sub>2</sub> and Ni(LKet-5Me4Im)<sub>2</sub> (in supplemental).

b) Valine, R= i-Pr

| Distance                          | Aldimine              | Ketimine   | Angle                                              | Aldimine              | Ketimine   |
|-----------------------------------|-----------------------|------------|----------------------------------------------------|-----------------------|------------|
| C <sub>Ald</sub> -C <sub>Im</sub> | 1.451(9)<br>1.432(10) | 1.495(2)   | C <sub>Im</sub> -C <sub>Ald</sub> -N <sub>AA</sub> | 116.0(6)<br>116.1(6)  | 108.56(12) |
| C <sub>Ald</sub> -N <sub>AA</sub> | 1.275(9)<br>1.276(9)  | 1.4645(19) | C <sub>Im</sub> -C <sub>Ald</sub> -H               | 122.0<br>121.9        | 110.0      |
| C <sub>Ald</sub> -H               | 0.9500<br>0.9500      | 0.9700     | C <sub>Im</sub> -C <sub>Ald</sub> -H'              | xxxx                  | 110.0      |
| C <sub>Ald</sub> -H'              | xxxxxx                | 0.9700     | N <sub>AA</sub> -C <sub>Ald</sub> -H               | 122.0<br>121.9        | 110.0      |
|                                   |                       |            | N <sub>AA</sub> -C <sub>Ald</sub> -H'              | xxxxx                 | 110.0      |
|                                   |                       |            | H-C <sub>Ald</sub> -H'                             | xxxxx                 | 108.4      |
|                                   |                       |            |                                                    |                       |            |
| N <sub>AA</sub> -C <sub>Ald</sub> | 1.275(9)<br>1.276(9)  | 1.4645(19) | Ni-N <sub>AA</sub> -C <sub>Ald</sub>               | 116.5(4)<br>116.9(5)  | 116.89(9)  |
| N <sub>AA</sub> -C <sub>α</sub>   | 1.454(8)<br>1.48(2)   | 1.2683(19) | Ni-N <sub>AA</sub> -C <sub>α</sub>                 | 117.0(4)<br>115.8(8)  | 117.53(10) |
| N <sub>AA</sub> -Ni               | 2.028(5)<br>2.012(5)  | 2.0288(12) | C <sub>α</sub> -N <sub>AA</sub> -C <sub>Ald</sub>  | 124.5(6)<br>126.9(9)  | 124.81(13) |
|                                   |                       |            |                                                    |                       |            |
| C <sub>α</sub> -N <sub>AA</sub>   | 1.454(8)<br>1.48(2)   | 1.2683(19) | N <sub>AA</sub> -C <sub>α</sub> -C <sub>β</sub>    | 113.1(6)<br>114.9(15) | 125.03(13) |
| C <sub>α</sub> -C <sub>β</sub>    | 1.555(9)<br>1.552(11) | 1.516(2)   | N <sub>AA</sub> -C <sub>α</sub> -C <sub>CA</sub>   | 107.5(9)<br>108.9(10) | 113.01(13) |
| C <sub>α</sub> -C <sub>CA</sub>   | 1.536(10)<br>1.48(2)  | 1.554(2)   | N <sub>AA</sub> -C <sub>α</sub> -H                 | 108.6<br>107.7        | xxxxx      |
| C <sub>α</sub> -H                 | 1.000<br>1.000        | xxxxxx     | C <sub>β</sub> -C <sub>α</sub> -C <sub>CA</sub>    | 110.0(6)<br>109.7(15) | 121.94(15) |
|                                   |                       |            | C <sub>β</sub> -C <sub>α</sub> -H                  | 108.6<br>107.7        | xxxxx      |
|                                   |                       |            | C <sub>CA</sub> -C <sub>α</sub> -H                 | 108.6<br>107.7        | xxxxx      |
|                                   |                       |            |                                                    |                       |            |

## c) Leucine, R=iBu

| Distance                          | Aldimine | Ketimine   | Angle                                              | Aldimine   | Ketimine   |
|-----------------------------------|----------|------------|----------------------------------------------------|------------|------------|
|                                   |          |            |                                                    |            |            |
| C <sub>Ald</sub> -C <sub>Im</sub> | 1.450(4) | 1.4966(19) | C <sub>Im</sub> -C <sub>Ald</sub> -N <sub>AA</sub> | 115.6(3)   | 107.39(11) |
| C <sub>Ald</sub> -N <sub>AA</sub> | 1.280(4) | 1.4638(16) | C <sub>Im</sub> -C <sub>Ald</sub> -H               | 122.2      | 110        |
| C <sub>Ald</sub> -H               | 0.9500   | 0.990      | C <sub>Im</sub> -C <sub>Ald</sub> -H'              | xxxxx      | 110        |
| C <sub>Ald</sub> -H'              | xxxxxxx  | 0.990      | N <sub>AA</sub> -C <sub>Ald</sub> -H               | 122.2      | 110        |
|                                   |          |            | N <sub>AA</sub> -C <sub>Ald</sub> -H'              | xxxxx      | 110        |
|                                   |          |            | H-C <sub>Ald</sub> -H'                             | xxxxx      | 109        |
|                                   |          |            |                                                    |            |            |
| N <sub>AA</sub> -C <sub>Ald</sub> | 1.280(4) | 1.4638(16) | Ni-N <sub>AA</sub> -C <sub>Ald</sub>               | 117.2(2)   | 118.41(8)  |
| N <sub>AA</sub> -C <sub>α</sub>   | 1.458(4) | 1.2732(16) | Ni-N <sub>AA</sub> -C <sub>α</sub>                 | 117.36(19) | 118.05(9)  |
| N <sub>AA</sub> -Ni               | 2.024(3) | 2.0221(10) | C <sub>α</sub> -N <sub>AA</sub> -C <sub>Ald</sub>  | 124.9(3)   | 123.52(11) |
|                                   |          |            |                                                    |            |            |
| C <sub>α</sub> -N <sub>AA</sub>   | 1.458(4) | 1.2732(16) | N <sub>AA</sub> -C <sub>α</sub> -C <sub>β</sub>    | 112.1(3)   | 126.68(12) |
| C <sub>α</sub> -C <sub>β</sub>    | 1.516(4) | 1.4989(19) | N <sub>AA</sub> -C <sub>α</sub> -C <sub>CA</sub>   | 107.1(2)   | 113.07(12) |
| C <sub>α</sub> -C <sub>CA</sub>   | 1.553(4) | 1.5453(18) | N <sub>AA</sub> -C <sub>α</sub> -H                 | 109.9      | xxxxx      |
| C <sub>α</sub> -H                 | 1.000    | xxxxxxx    | C <sub>β</sub> -C <sub>α</sub> -C <sub>CA</sub>    | 107.8(3)   | 120.25(12) |
|                                   |          |            | C <sub>β</sub> -C <sub>α</sub> -H                  | 109.9      | xxxxx      |
|                                   |          |            | C <sub>CA</sub> -C <sub>α</sub> -H                 | 109.9      | xxxxx      |
|                                   |          |            |                                                    |            |            |
